# Supplementary material for: Mannose-Binding Lectin (MBL) and MBL-associated serine protease-2 (MASP-2) in women with malignant and benign ovarian tumours
Source: Springer Nature journal article supplement (doi:10.1007/s00262-014-1579-y), 2014-07-19
Supplement: MOESM1 [file 8232708]

**Cancer Immunology, Immunotherapy** (submitted in 2014) – Anna St. Swierzko et al.

**Supplementary Table 1** Frequencies of *MBL2* gene exon 1 alleles (*A, B, C, D*).

| Group    | C     | NO    | BT                 | OC                 | OC<br>G1-2         | OC<br>G3 |
|----------|-------|-------|--------------------|--------------------|--------------------|----------|
| <b>n</b> | 172   | 65    | 107                | 117                | 33                 | 63       |
| <b>A</b> | 0.811 | 0.838 | 0.794              | 0.756              | 0.712              | 0.770    |
| <b>B</b> | 0.131 | 0.146 | 0.121              | 0.171              | 0.182              | 0.175    |
| <b>C</b> | 0.020 | 0.008 | 0.028              | 0.021              | 0.030              | 0.016    |
| <b>D</b> | 0.038 | 0.008 | 0.056 <sup>a</sup> | 0.051 <sup>b</sup> | 0.076 <sup>a</sup> | 0.040    |
| <b>O</b> | 0.189 | 0.162 | 0.206              | 0.244              | 0.288              | 0.230    |

**C** – control group, including **NO** – patients with no ovarian pathology and **BT** – patients with benign ovarian tumours; **OC** – patients with primary ovarian cancer;

<sup>a</sup> - p=0.02 (vs NO)

<sup>b</sup> - p=0.04 (vs NO)

**Supplementary Table 2** MBL, MASP-2 concentrations and activities of MBL-MASP-2 and MBL-MASP-1 complexes in ovarian cancer patients and controls.

| Parameter                         |        | Group                     |                           |                            |                            |
|-----------------------------------|--------|---------------------------|---------------------------|----------------------------|----------------------------|
|                                   |        | C<br>(n=164) <sup>a</sup> | NO<br>(n=62) <sup>b</sup> | BT<br>(n=102) <sup>c</sup> | OC<br>(n=107) <sup>d</sup> |
| MBL concentration<br>[ng/ml]      | median | 641                       | 708                       | 594                        | 714                        |
|                                   | mean   | 918                       | 894                       | 933                        | 1249                       |
|                                   | range  | 1 – 3493                  | 1 – 2831                  | 1 – 3493                   | 1 – 7524                   |
| MASP-2<br>concentration [ng/ml]   | median | 375                       | 356                       | 389                        | 394                        |
|                                   | mean   | 398                       | 395                       | 400                        | 420                        |
|                                   | range  | 49 – 1091                 | 137 – 1003                | 49 – 1091                  | 1 – 1187                   |
| MBL-MASP-2<br>activity<br>[mU/ml] | median | 224                       | 242                       | 208                        | 233                        |
|                                   | mean   | 350                       | 374                       | 326                        | 412                        |
|                                   | range  | 1 – 1911                  | 1 – 1848                  | 1 – 1911                   | 1 – 1902                   |
| MBL-MASP-1<br>activity [mU/ml]    | median | 202                       | 230                       | 158                        | 173                        |
|                                   | mean   | 279                       | 295                       | 270                        | 300                        |
|                                   | range  | 1 – 1839                  | 1 – 1766                  | 1 – 1839                   | 1 – 1555                   |

Detection limits are 10 ng/ml (MBL concentration); 25 ng/ml (MASP-2 concentration); 60 mU/ml (MBL-MASP-2 complex activity); 50 mU/ml (MBL-MASP-1 activity). Values shown as "1" were under detection limit.

**C** – control group, including **NO** – patients with no ovarian pathology and **BT** – patients with benign ovarian tumours; **OC** – patients with primary ovarian cancer;

<sup>a</sup> - n=162 for MASP-2 concentration and MBL-MASP-1 activity

<sup>b</sup> - n=61 for MBL-MASP-2 activity

<sup>c</sup> - n=100 for MASP-2 concentration and MBL-MASP-1 activity; n=103 for MBL-MASP-2 activity

<sup>d</sup> - n=106 for MASP-2 concentration

**Supplementary Table 3** MBL-MASP-2 complex activities in patients carrying A/A (*MBL2*) and A/A (*MASP2*) genotypes.

|                                   |        | <b>Group</b>    |                  |                  |                  |
|-----------------------------------|--------|-----------------|------------------|------------------|------------------|
|                                   |        | <b>C</b> (n=96) | <b>NO</b> (n=39) | <b>BT</b> (n=57) | <b>OC</b> (n=53) |
| MBL-MASP-2<br>activity<br>[mU/ml] | median | 321             | 263              | 337              | 537 <sup>a</sup> |
|                                   | mean   | 475             | 458              | 486              | 606              |
|                                   | range  | 1 – 1911        | 1 – 1848         | 1 – 1911         | 1 – 1740         |

Values shown as "1" were under detection limit (60 mU/ml)

**C** – control group, including **NO** – patients with no ovarian pathology and **BT** – patients with benign ovarian tumours; **OC** – patients with primary ovarian cancer;

<sup>a</sup> - p=0.0497 (vs C); p=0.07 (vs NO); p=0.09 (vs BT)
